# Supplementary material for: Development of Low Hysteresis, Linear Weft-Knitted Strain Sensors for Smart Textile Applications
Source: MDPI journal article supplement (doi:10.3390/s22197688), 2022-10-10
Supplement: s1 [file s1]

## Supporting Information

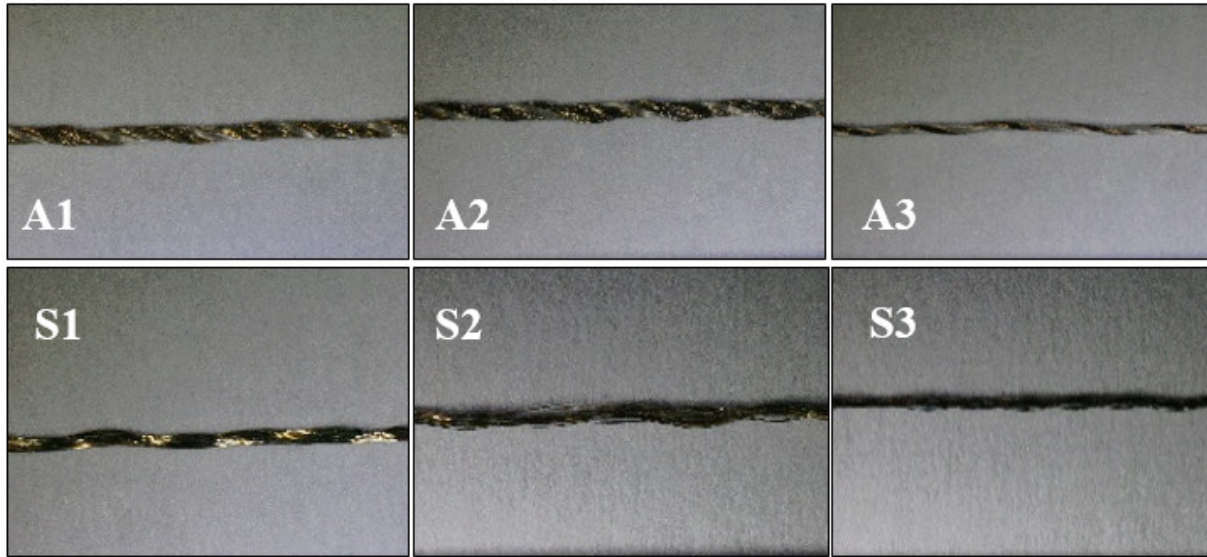

| Resistivity<br>(ohm) | Shieldex (S)                |                            |                           | Amann (A)                   |                                |                               |
|----------------------|-----------------------------|----------------------------|---------------------------|-----------------------------|--------------------------------|-------------------------------|
|                      | A1                          | A2                         | A3                        | S1                          | S2                             | S3                            |
|                      | Tex 28<br>< 530 $\Omega$ /m | Tex 62<br><150 $\Omega$ /m | Tex 96<br><85 $\Omega$ /m | Dtex 235<br>600 $\Omega$ /m | Dtex 117<br><1.5 k $\Omega$ /m | Dtex 78<br><3.5 k $\Omega$ /m |

**Figure S1.** Optical images of conductive yarns in which 'S' refers to the Shieldex yarn (Material: Polyamide 6.6 filament, Metal Plated: 99 % Pure silver) and 'A' refers to Amann yarn (Silver coated Polyamide/Polyester hybrid thread).

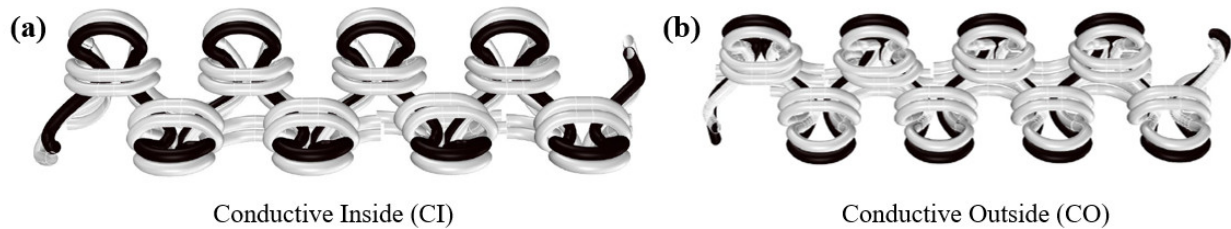

**Figure S2.** The position of conductive yarn within the co-knit yarn configuration: (a) Conductive yarn (black yarn) positioned inside, and (b) Elastic yarn (white yarn) positioned inside.

**Table S1.** The effect of test speed on electromechanical performance of the knitted strain sensors of NP<sub>9</sub>Y<sub>S1</sub>C<sub>2</sub>E<sub>1</sub>, NP<sub>10</sub>Y<sub>S1</sub>C<sub>2</sub>E<sub>1</sub> and NP<sub>10</sub>Y<sub>S1</sub>C<sub>3</sub>E<sub>1</sub>.

| Samples                                                        | Test Speed<br>(mm/min) | Initial<br>Resistance<br>(Ω) | Gauge<br>Factor<br>(GF) | Working<br>Range (%) | Hysteresis |
|----------------------------------------------------------------|------------------------|------------------------------|-------------------------|----------------------|------------|
| NP <sub>9</sub> Y <sub>S1</sub> C <sub>2</sub> E <sub>1</sub>  | 30                     | 17.33                        | 1.60                    | 0-22                 | 0.07       |
|                                                                | 40                     | 17.19                        | 1.80                    | 0-20                 | 0.07       |
|                                                                | 50                     | 17.22                        | 1.80                    | 0-22                 | 0.07       |
| NP <sub>10</sub> Y <sub>S1</sub> C <sub>2</sub> E <sub>1</sub> | 30                     | 23.40                        | 1.14                    | 0-23                 | 0.07       |
|                                                                | 40                     | 23.60                        | 1.11                    | 0-24                 | 0.05       |
|                                                                | 50                     | 23.03                        | 1.40                    | 0-25                 | 0.07       |
| NP <sub>10</sub> Y <sub>S1</sub> C <sub>3</sub> E <sub>1</sub> | 30                     | 7.13                         | 0.23                    | 0-36                 | 0.25       |
|                                                                | 40                     | 7.21                         | 0.37                    | 0-17                 | 0.30       |
|                                                                | 50                     | 7.21                         | 0.52                    | 0-17                 | 0.27       |

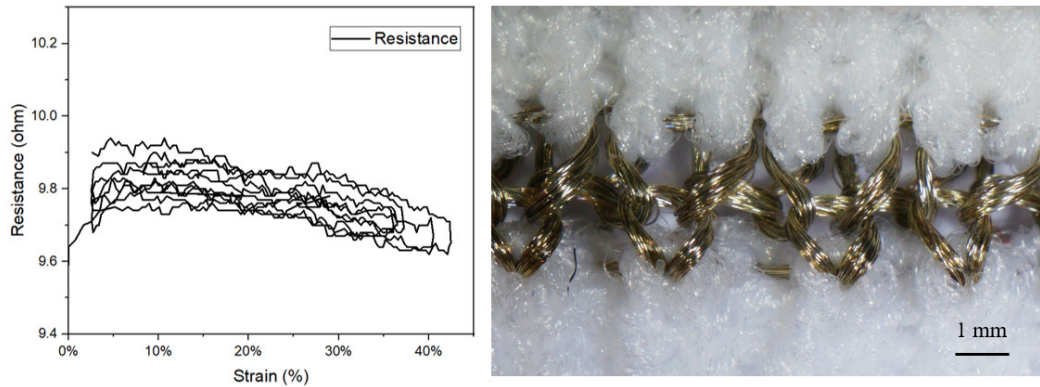

**Figure S3.** The resistance versus strain graph without E<sub>1</sub> plating/elastic yarn as a co-knit material for the NP<sub>9</sub>Y<sub>S1</sub>C<sub>2</sub> sample (**left**)—Optical image of the NP<sub>9</sub>Y<sub>S1</sub>C<sub>2</sub> sample without elastic plating yarn (**right**).

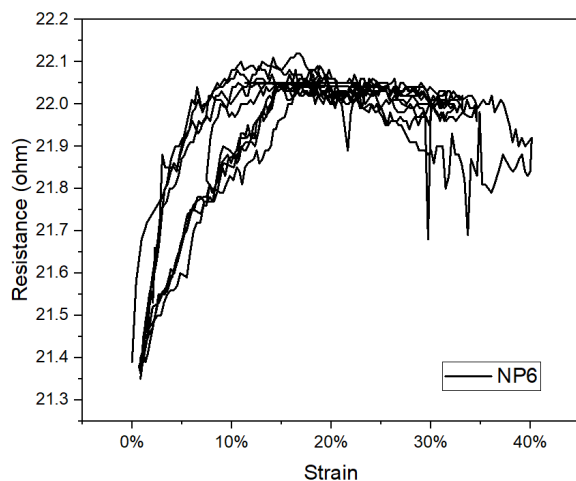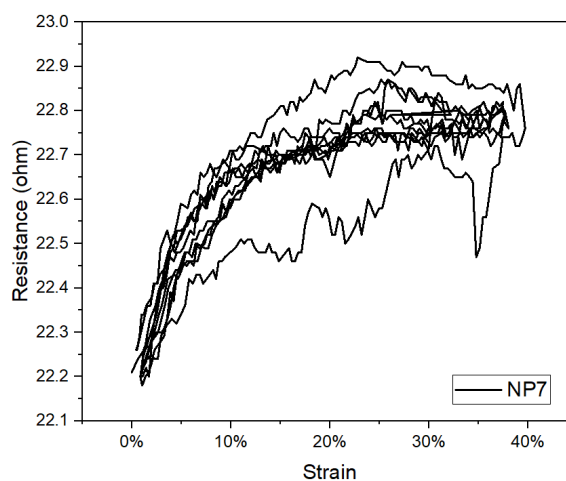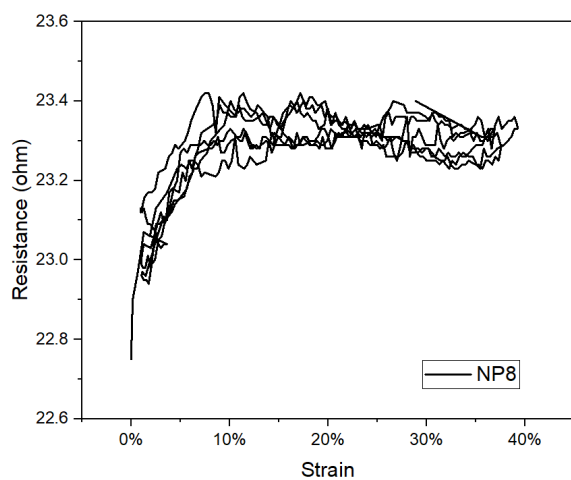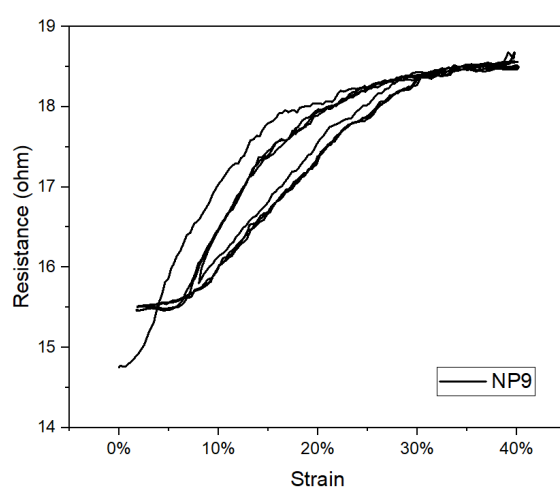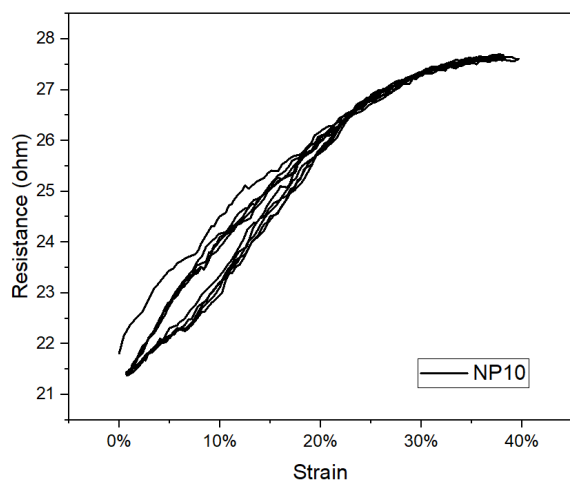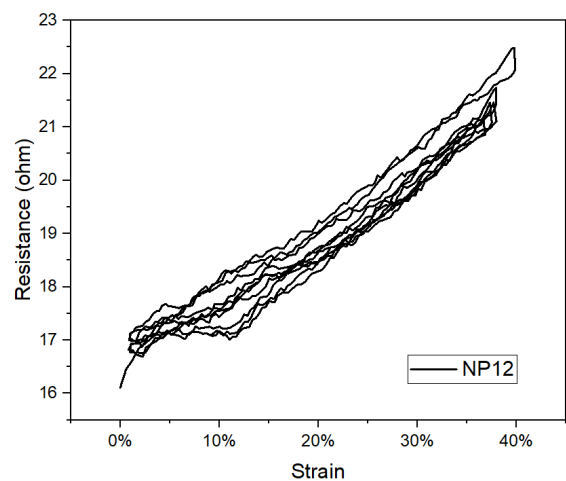

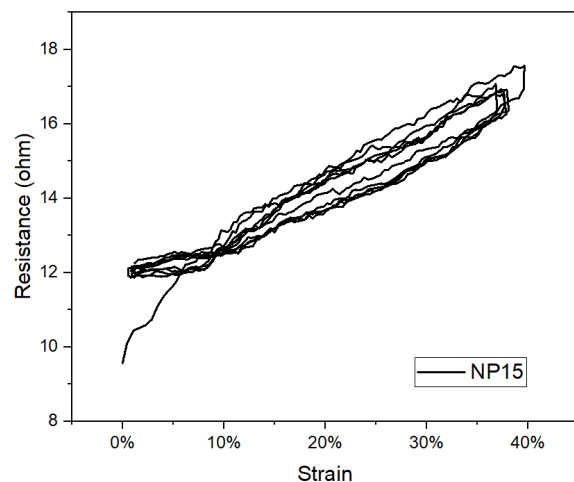

**Figure S4.** Examples of irregular and regular cyclic patterns: NP<sub>6</sub>, NP<sub>7</sub>, NP<sub>8</sub>, NP<sub>9</sub>, NP<sub>10</sub>, NP<sub>12</sub>, NP<sub>15</sub>. Resistance versus strain graphs for the series of NP<sub>x</sub>Y<sub>Si</sub>C<sub>2</sub>E<sub>1</sub>.

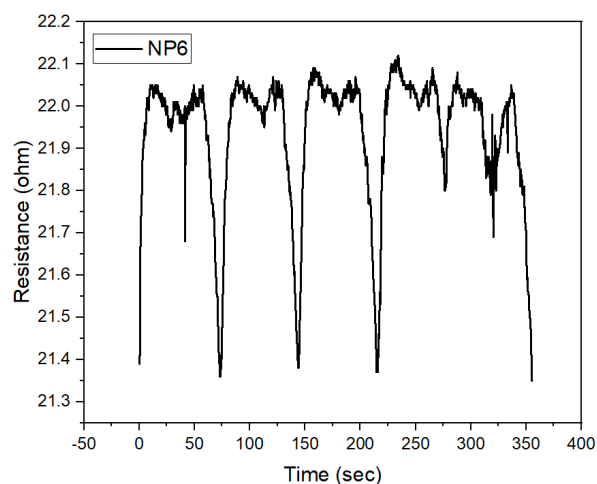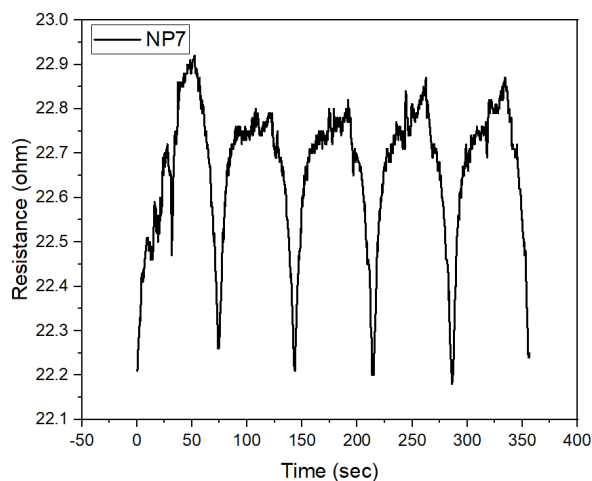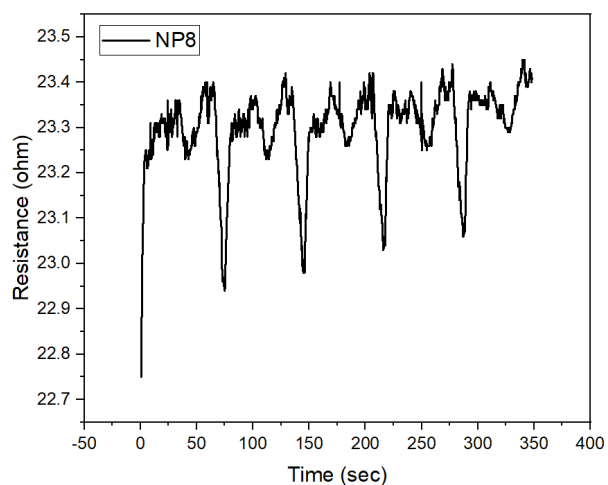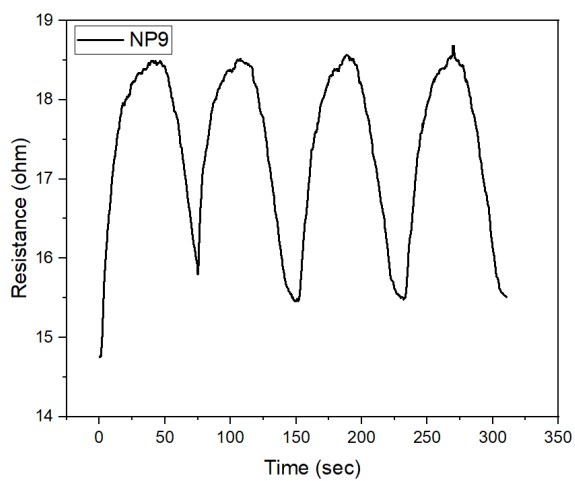

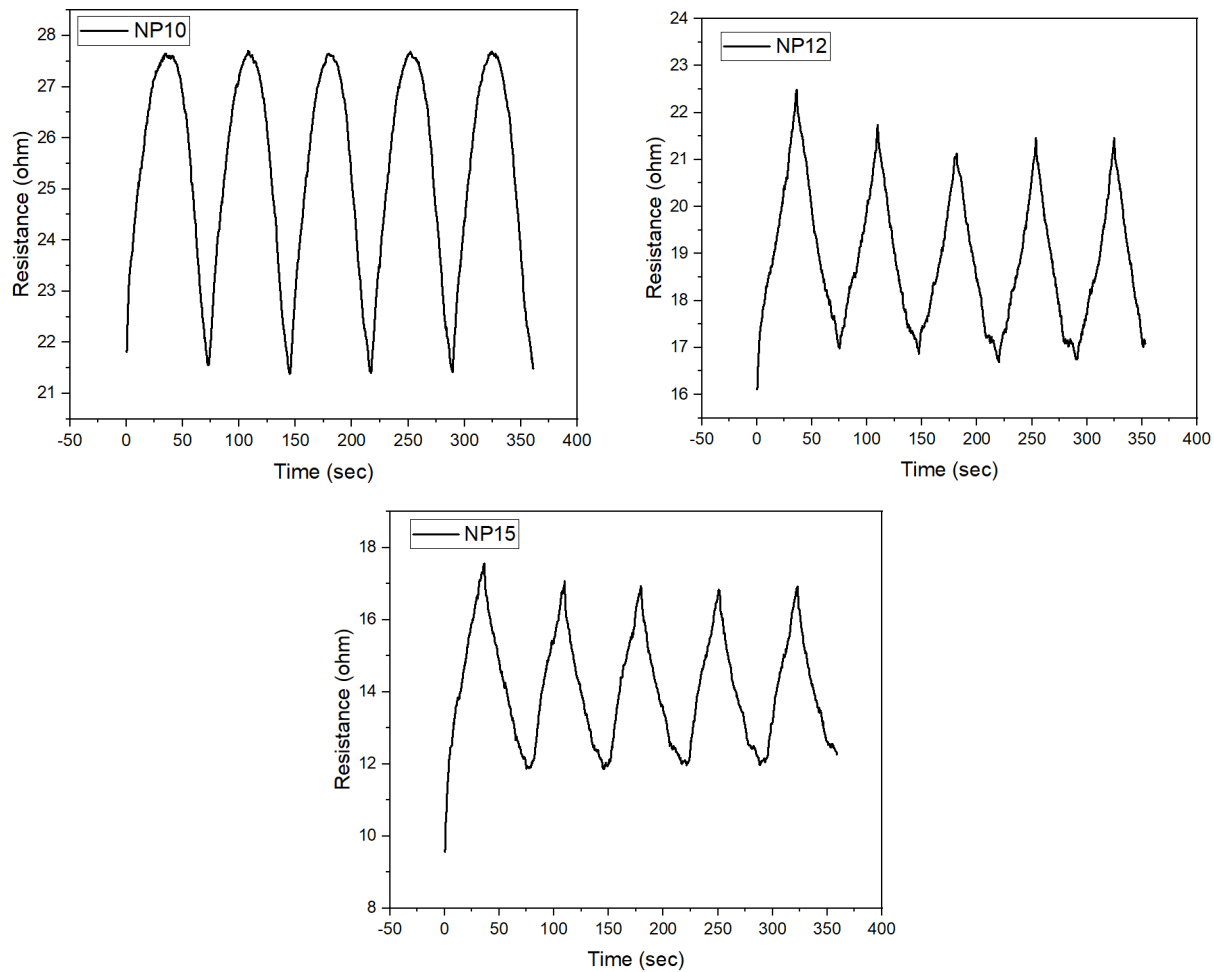

**Figure S5.** Examples of irregular and regular cyclic patterns: NP<sub>6</sub>, NP<sub>7</sub>, NP<sub>8</sub>, NP<sub>9</sub>, NP<sub>10</sub>, NP<sub>12</sub>, NP<sub>15</sub>. Resistance versus time graphs for the series of NP<sub>x</sub>Y<sub>S1</sub>C<sub>2</sub>E<sub>1</sub>.

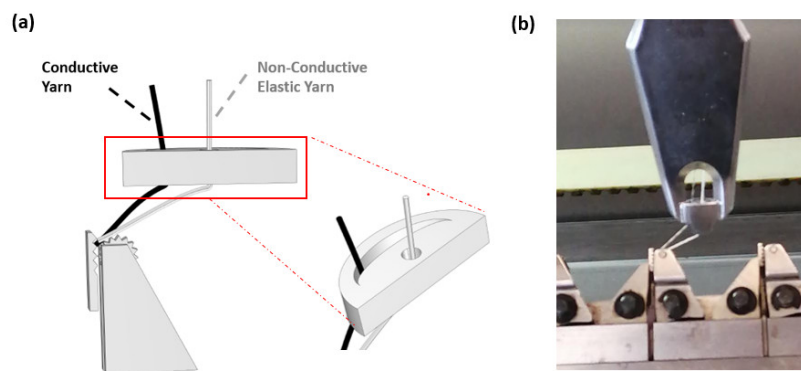

**Figure S6.** The schematic of yarn carrier (a), and picture of plated yarn carrier with 2 yarns consisting of conductive yarn and non-conductive elastic yarn (b).

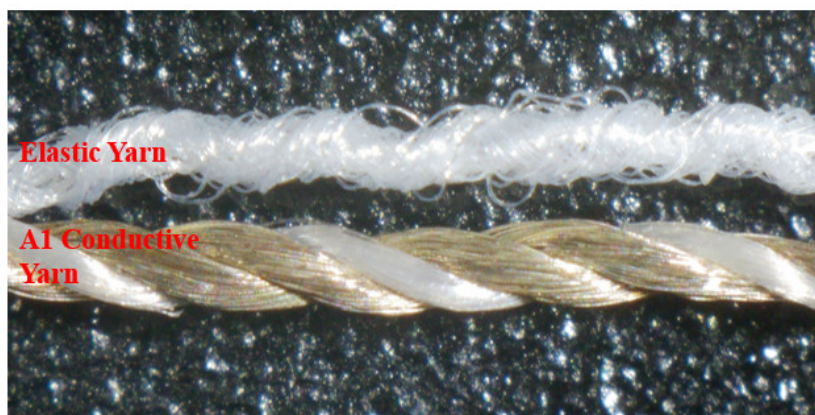

**Figure S7.** Optical image of plating elastic yarn (white) and A1 conductive yarn (white and silver).
